# Supplementary figures and images for: Synthesis and properties of high performance thermoplastic polycarbonate polyurethane elastomers through a non-isocyanate route
Source: Royal Society of Chemistry journal article supplement (doi:10.1039/d2ra05613e), 2022-01-01

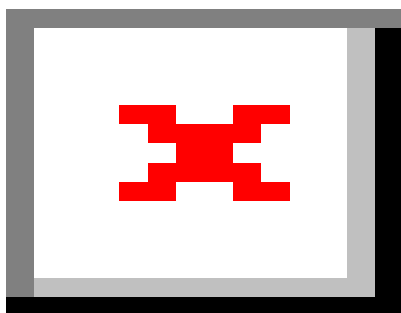

Fig. S1  $^1\text{H}$  NMR spectra of BHCH

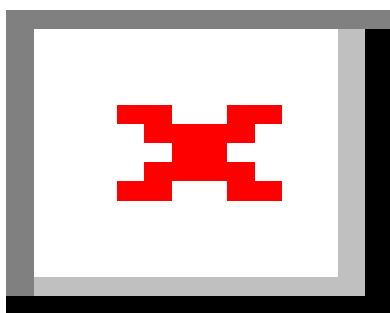

Fig. S2  $^1\text{H}$  NMR spectra of PCDL2000

Supplement: d2ra05613e1.pdf [file d2ra05613e1.pdf]
